# Supplementary material
Source: PubMed Central journal article supplement (PMC11105044)
Supplement: 18_2019_3260_MOESM1_ESM.pdf [file 18_2019_3260_MOESM1_ESM.pdf]

**Supplementary Material.**

**Colás et al.**

**Compensatory increase of VE-cadherin expression through ETS1  
regulates endothelial barrier function in response to TNF $\alpha$**

Number of supplementary figures: 5

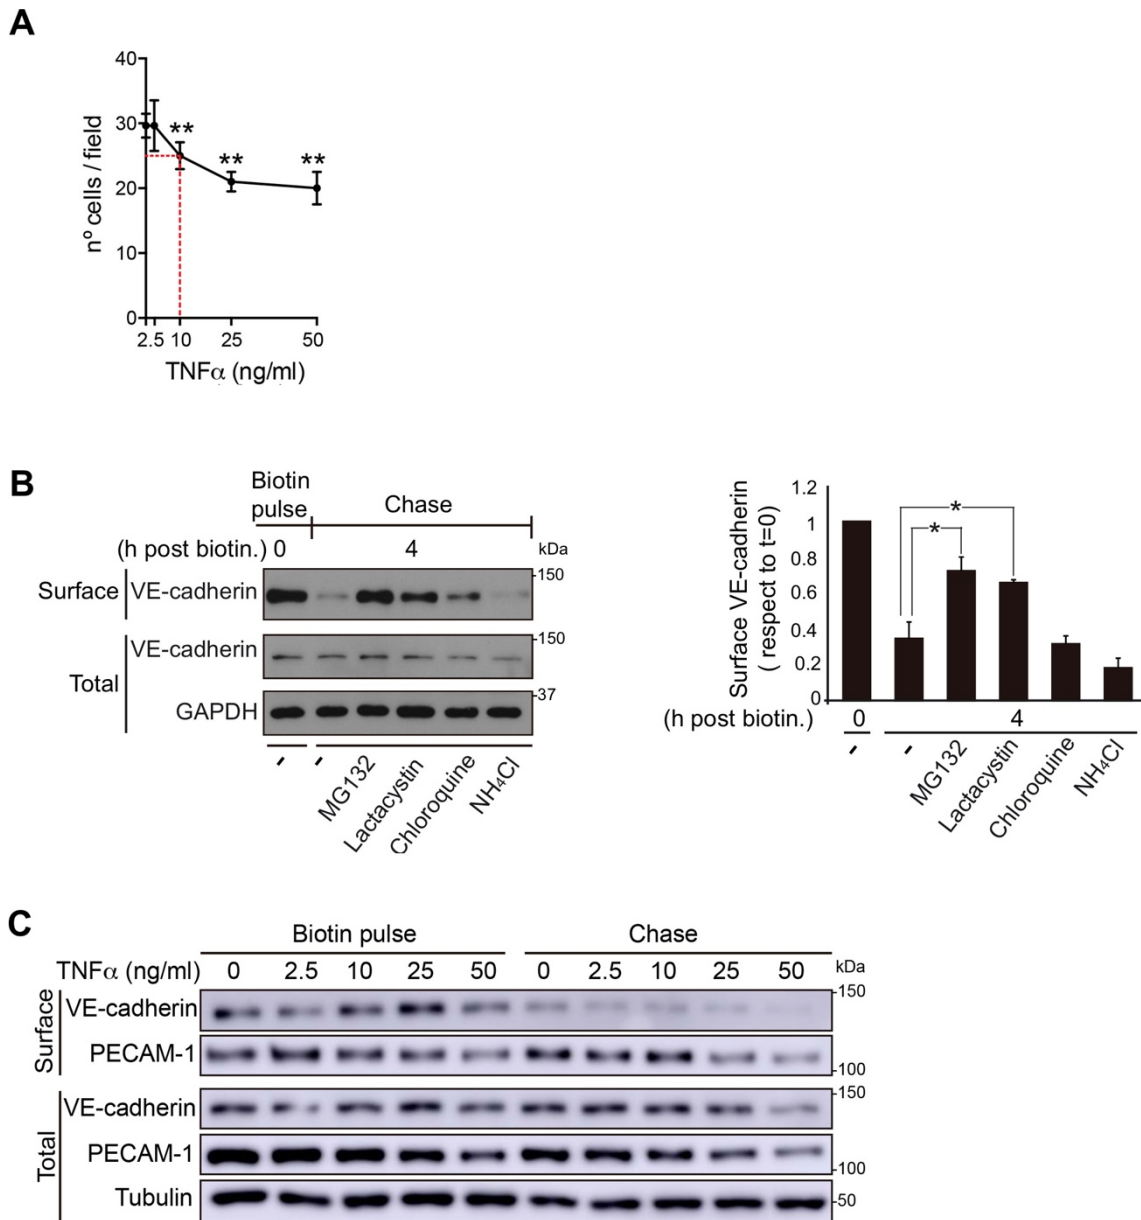

**Figure S1. Effect of TNF $\alpha$  on cell density and surface VE-cadherin and PECAM-1 degradation.** **(A)** HUVECs were stimulated with TNF $\alpha$  for 24 h at the indicated concentrations as in Fig. 1. Cells were fixed and stained for VE-cadherin and nuclei and the number of cells per field were quantified by confocal microscopy. Graphs show the mean  $\pm$  SEM from three independent experiments. \*\*,  $p < 0.005$ . Discontinuous red line point at cell number decrease (15%) caused by TNF $\alpha$  at the concentration used through the manuscript. **(B)** Surface VE-cadherin degradation is

reduced in the presence of proteasome inhibitors. HUVECs stimulated with TNF $\alpha$  for 24 h were pulsed for 30 min with sulfo-NHS-biotin to label surface proteins and then lysed (chase) after 4 h of incubation at 37°C in the presence of 20  $\mu$ M MG132 and 10  $\mu$ M lactacystin as proteasome inhibitors, and of 300 mM chloroquine and 10 mM NH $_4$ Cl as lysosomal inhibitors, as indicated. Surface-biotinylated proteins were isolated by pull-down assay with neutravidin-agarose. Surface VE-cadherin levels were detected with a specific antibody from the pull-down fraction and compared with total VE-cadherin levels from the lysate. Immunoblot of GAPDH is shown as loading control. Graphs show the mean + SEM from three independent experiments. \*, p<0.05. **(C)** HUVECs were stimulated with TNF $\alpha$  for 24 h at the indicated concentrations. Then cells were pulsed for 30 min with sulfo-NHS-biotin to label surface proteins and lysed (chase) after 4 h of incubation at 37°C. Surface-biotinylated proteins were isolated by pull-down assay with neutravidin-agarose. Surface VE-cadherin and PECAM-1 levels were detected with a specific antibody from the pull-down fraction and compared with total VE-cadherin and PECAM-1 levels from the lysate. Immunoblot of tubulin is shown as loading control. See also Fig. 1.

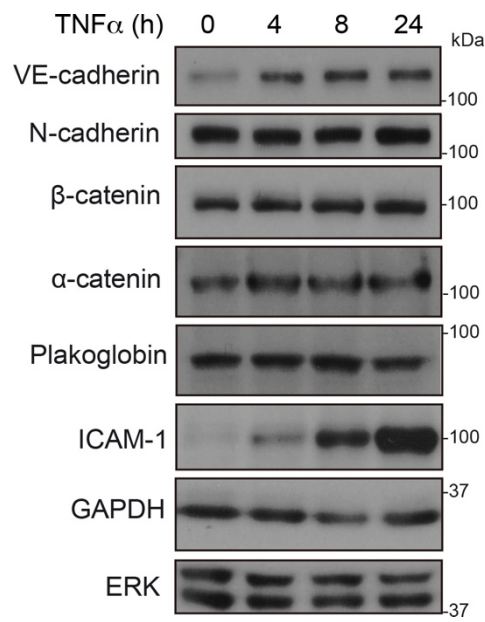

**Figure S2. Effect of TNF $\alpha$  stimulation on endothelial junctional protein expression.** HUVECs were cultured at confluence for 48 h on dishes pre-coated with fibronectin, starved for 12 h and then stimulated or not with 10 ng/ml TNF $\alpha$  for the indicated times. Cell lysates were immunoblotted with the indicated antibodies against junctional proteins. Note that VE-cadherin is the only junctional protein whose expression in the lysates is induced by TNF $\alpha$ . Immunoblot of ERK is shown as a loading control. Immunoblot of ICAM-1 is shown as a control of TNF $\alpha$  stimulation. See also Fig. 2.

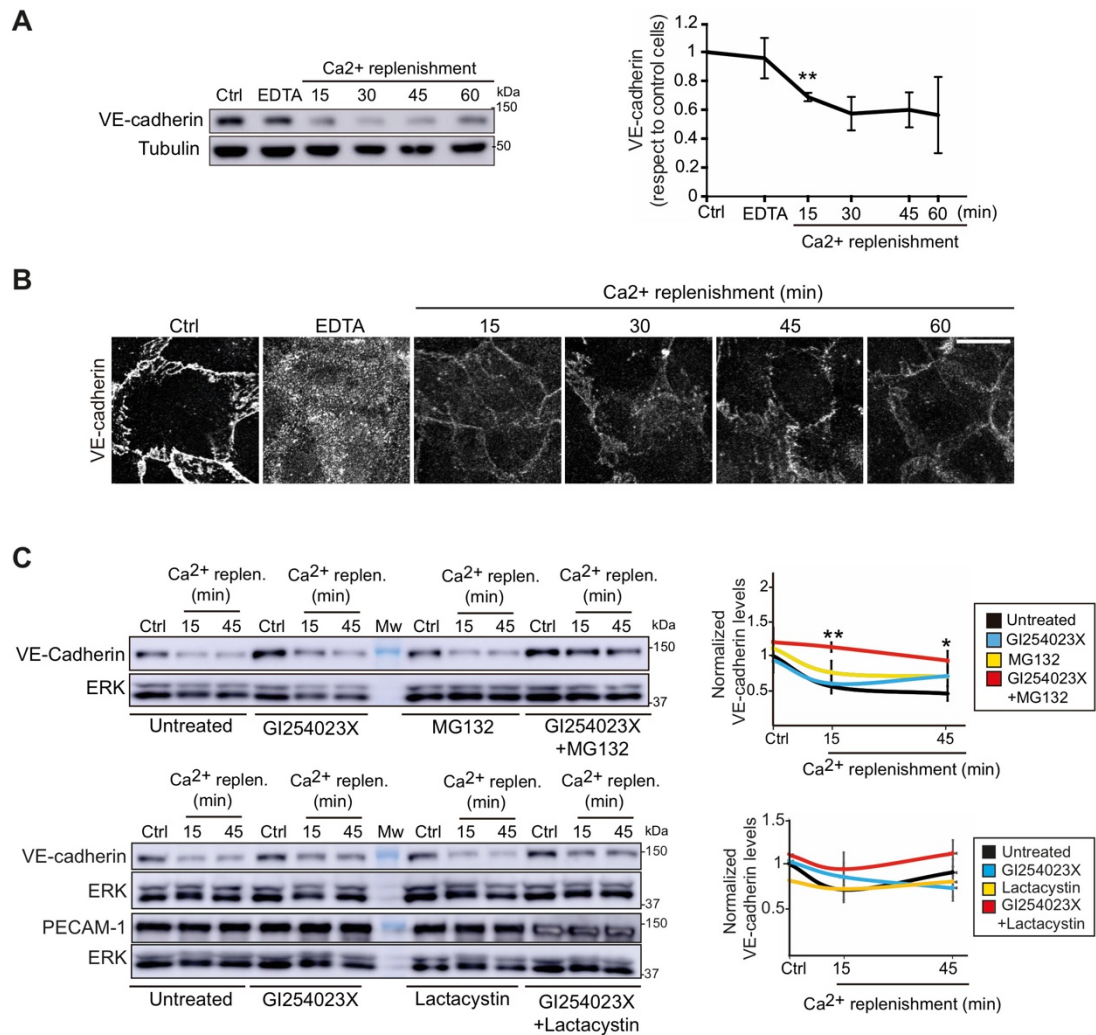

**Figure S3. (A,B) Ca<sup>2+</sup> switch (CS) assays induced with EDTA.** HUVECs were cultured at confluence for 48 h, starved for 12 h and then stimulated with 10 ng/ml TNF $\alpha$  for 24 h before performing a Ca<sup>2+</sup> switch (CS) assay by adding 3 mM EDTA in the culture medium. Ca<sup>2+</sup> was restored by adding fresh medium and cells were lysed (A) or fixed for immunofluorescence (B) at the indicated times. (A) Graph show VE-cadherin expression levels detected by western blot from at least three independent experiments. \*,  $p < 0.05$ , t-test shows comparison between control cell lysates and lysates from cells 15 min post-Ca<sup>2+</sup> restoration. Tubulin was immunoblotted as a loading control (C) Simultaneous inhibition of proteasome and ADAM-10 prevents

reduction of VE-cadherin protein levels during Ca<sup>2+</sup> switch assays. HUVECs were cultured at confluence for 48 h, starved for 12 h and then stimulated with 10 ng/ml TNF $\alpha$  for 24 h before performing a Ca<sup>2+</sup> switch (CS) assay with PBS. Cells were lysed before Ca<sup>2+</sup> depletion (Ctrl) or 15 and 45 min after Ca<sup>2+</sup> replenishment in the presence or absence of the indicated inhibitors. VE-cadherin expression levels were detected by western blot. Graphs on the right-hand side show the quantification of VE-cadherin expression levels with respect to untreated control cells from three independent experiments. \*, p=0.016. \*\*, p=0.0015, t-tests comparing with control cells. See also Fig. 3.

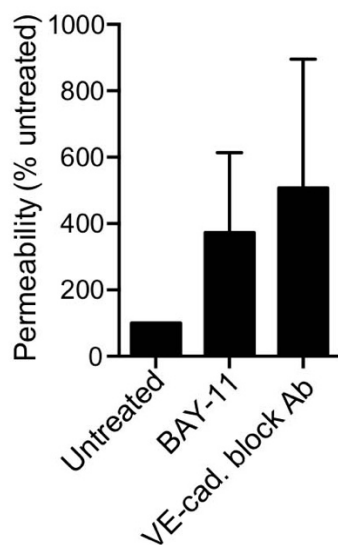

**Figure S4. The NF- $\kappa$ B inhibitor BAY11 and the anti-VE-cadherin blocking antibody increase endothelial permeability.** HUVECs were cultured at confluence for 48 h on transwells of 0.4  $\mu$ m pore diameter precoated with fibronectin, starved for 12 h and incubated with 0.1 mg/ml of FITC-dextran for 90 min in the presence or absence of 10  $\mu$ M BAY11 and 20  $\mu$ g/ml VE-cadherin blocking antibody. Graph shows the mean fluorescence values + SEM of two independent experiments performed in triplicates.

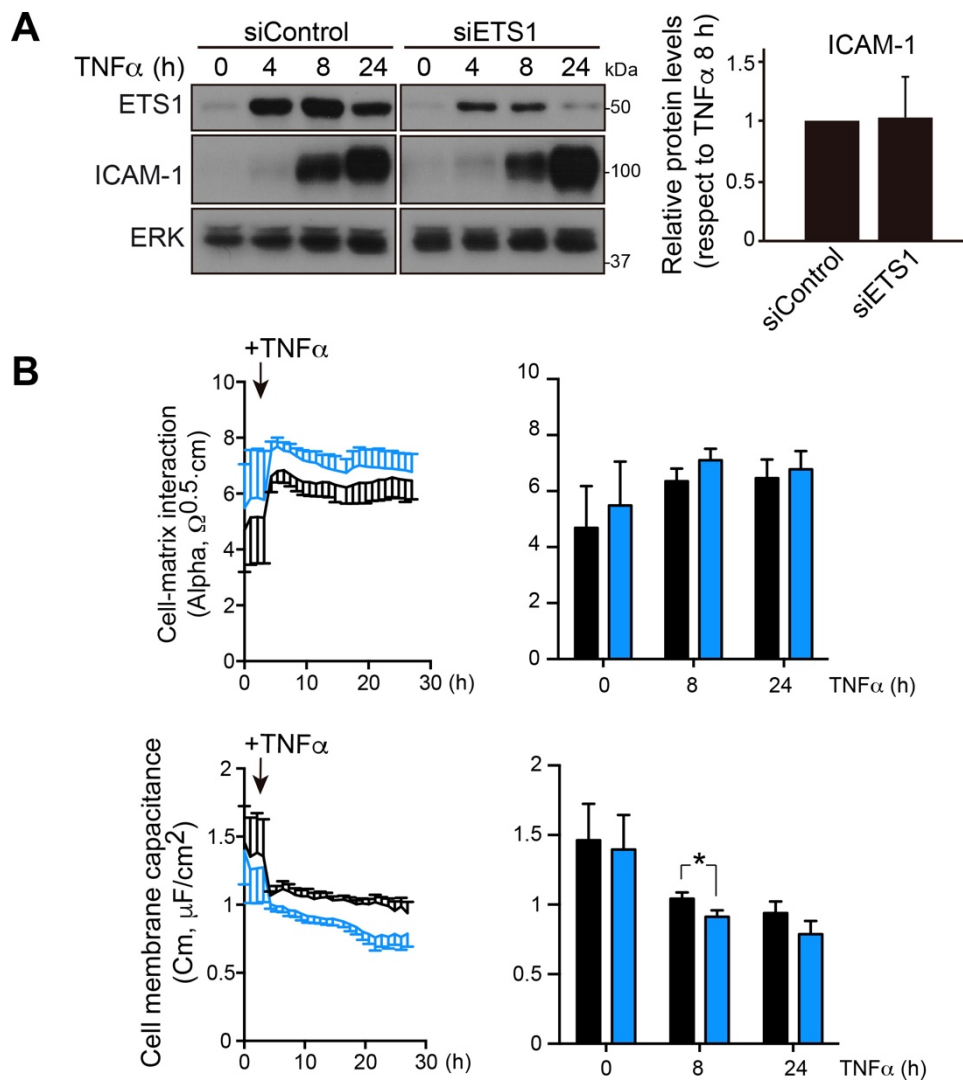

**Figure S5. (A)** siRNA-mediated knockdown of ETS1 (siETS1) does not reduce ICAM-1 protein expression. Graphs show quantifications of ICAM-1 levels with respect to siControl after 8 h of TNF $\alpha$  stimulation. Mean + SEM from three independent experiments. **(B)** Effect of ETS1 knockdown on Alpha and Cm. ECIS mathematical modelling reveals minor changes in cell-matrix interactions (Alpha), and endothelial Cell membrane capacitance (Cm). Graphs show the mean + SEM from three independent experiments measured at the indicated times of TNF $\alpha$  stimulation. \*,  $p < 0.05$ . See Fig. 6F.
